# Supplementary material for: Possibilities of Using Medicinal Plant Extracts and Salt-Containing Raw Materials from the Aral Region for Cosmetic Purposes
Source: MDPI journal article supplement (doi:10.3390/molecules27165122), 2022-08-11
Supplement: s1 [file s1]

# Possibilities of Using Medicinal Plants Extracts and Salt-Containing Raw Materials from the Aral Region for Cosmetic Purposes

Izabela Nowak <sup>1,\*</sup>, Akmaral Issayeva <sup>2,\*</sup>, Marta Dąbrowska <sup>1</sup>, Agata Wawrzyńczak <sup>1</sup>, Henryk Jeleń <sup>3</sup>, Bogusława Łęska <sup>1</sup>, Azhar Abubakirova <sup>4</sup> and Assel Tleukeyeva <sup>4</sup>

<sup>1</sup> Faculty of Chemistry, Adam Mickiewicz University, Uniwersytetu Poznańskiego 8, 61-614 Poznań, Poland

<sup>2</sup> Ecology and Biology Research Institute, Shymkent University, Shymkent 160000, Kazakhstan

<sup>3</sup> Faculty of Food Science and Nutrition, Poznań University of Life Sciences, Wojska Polskiego 31, 60-624 Poznań, Poland

<sup>4</sup> M. Auezov South Kazakhstan University, Shymkent 160000, Kazakhstan

\* Correspondence: nowakiza@amu.edu.pl (I.N.); akmaral.issayeva@bk.ru (A.I.)

## Supplementary Materials

### Sample preparation

**Scrub 1.** Universal scrub for normal to oily skin types. The scrub is based on: the muddy bottom mud of the Aral Sea - 80%, the scarifier (fine grinding of walnut shells) -4%, herbal extracts -9%, and natural aromatic additives -7%. The composition of medicinal herbs contains the following composition,% by weight:

- grinding of ordinary harmonica -0.5;
- grinding of tansy -0.5;
- grinding of thyme ordinary -1.0;
- grinding of sage meadow -2.0;
- grinding of yarrow -1.0;
- grinding of licorice -4.0;
- grinding the mountaineer -4.0.

Natural aromatic additives contain the following composition,% by weight:

- extract of essential oils of garden roses -2.0;
- extract of essential oils of thyme ordinary -5.0.

**Scrub 2.** Scrub for sensitive skin. The basis of the scrub is the muddy bottom mud of the Aral Sea -75%. As a scarifier, grinding of phytomass of medicinal plants after extraction of -15% is used. Herbal extract 8%, natural aromatic additives -2%. The composition of medicinal herbs contains the following composition,% by weight:

- grinding of licorice -3.0;
- grinding of white mulberry -1.0;
- grinding of silver sucker - 1.0;
- grinding of the mountaineer -3.0;
- grinding of mint field t - 1.0;

- grinding of lemon balm 1.0;
- grinding the petals of a garden red rose -2.

Natural aromatic additives contain the following composition,% by weight:

- silver sucker essential oil extract -1.0;
- extract of essential oils of mint field - 1.0.

**Scrub 3.** Healing scrub for problem skin without the content of hard scarifiers. The basis of the scrub is healing mud of the Aral Sea -80. As a scarifier, grinding phytomass of a special composition of medicinal plants after extraction of -14% is used. Herbal extract 6%, natural aromatic additives -2%. The composition of medicinal herbs contains the following composition,% by weight:

- grinding of thyme ordinary -2.0;
- grinding of sage meadow - 1.0;
- grinding of lemon balm medicinal - 5.0;
- grinding of white mulberry -2.0;
- grinding of yarrow -2.0;
- grinding of psoralea skeleton - 4.0;
- grinding of the camel thorns -5.0.

Natural aromatic additives contain the following composition,% by weight:

- sage essential oil extract -1.0;
- extract of thyme essential oils -1.0.

**Universal mask 4.** The basis of the mask is healing mud of the Aral Sea -70%. Grinding and extract of herbs -20%, natural aromatic additives - 10%. The composition of medicinal herbs contains the following composition,% by weight:

- grinding sage meadow -3.0;
- grinding of thyme ordinary-6.0;
- grinding of yarrow -3.0;
- grinding of ordinary harmonica -2.0;
- grinding of camel thorns -2.0;
- grinding of lemon balm medicinal -2.0;
- grinding of wormwood citrate -2.0;
- grinding of a red garden rose -3.0.

Natural aromatic additives contain the following composition,% by weight:

- extract of essential oils of sage meadow -3.0;
- extract of essential oils of thyme ordinary -2.0.

**Mask 5.** Mask for sensitive skin for dry and problematic skin types. The basis of the mask is healing mud of the Aral Sea -83%. Grinding and extract of herbs -12%, natural aromatic additives - 5%. The composition of medicinal herbs contains the following composition,% by weight:

- grinding of yarrow -1.0;
- grinding of mint field mint -6.0;
- grinding of lemon balm -1.0;

- grinding of silver sucker -2.0;
- grinding of petals of a white garden rose -1.0;
- grinding of white mulberry-6.0.

Natural aromatic additives contain the following composition,% by weight:

- extract of essential oils of common lilac -3.0;
- black elderberry essential oil extract -2.0.

**Mask 6.** The mask is medical. The basis of the mask is healing mud of the Aral Sea - 72%. Grinding and extract of medicinal herbs 25-%, natural aromatic additives - 3%.

The composition of medicinal herbs contains the following composition,% by weight:

- grinding of psoralean skeleton -20.0;
- grinding of white mulberry - 3.0;
- grinding petals of a white garden rose - 2.0.

Natural aromatic additives contain the following composition,% by weight:

- extract of essential oils of lemon balm -3.0.

**Scrub 7.** Nutritious scrub. The basis of the scrub is healing mud mud of the Aral Sea - 90%. Grinding and extract of herbs -7%, natural aromatic additives - 3%. The composition of medicinal herbs contains the following composition,% by weight:

- grinding of sage meadow -3.0;
- grinding of thyme ordinary -3.0;
- grinding of yarrow -3.0;
- grinding of ordinary harmonica -2.0;
- grinding of camel thorns -2.0;
- grinding of lemon balm medicinal -2.0;
- grinding of wormwood citrate -2.0;
- grinding of a red garden rose -3.0.

Natural aromatic additives contain the following composition,% by weight:

- extract of essential oils of sage meadow -3.0;
- thyme essential oil extract -2.0

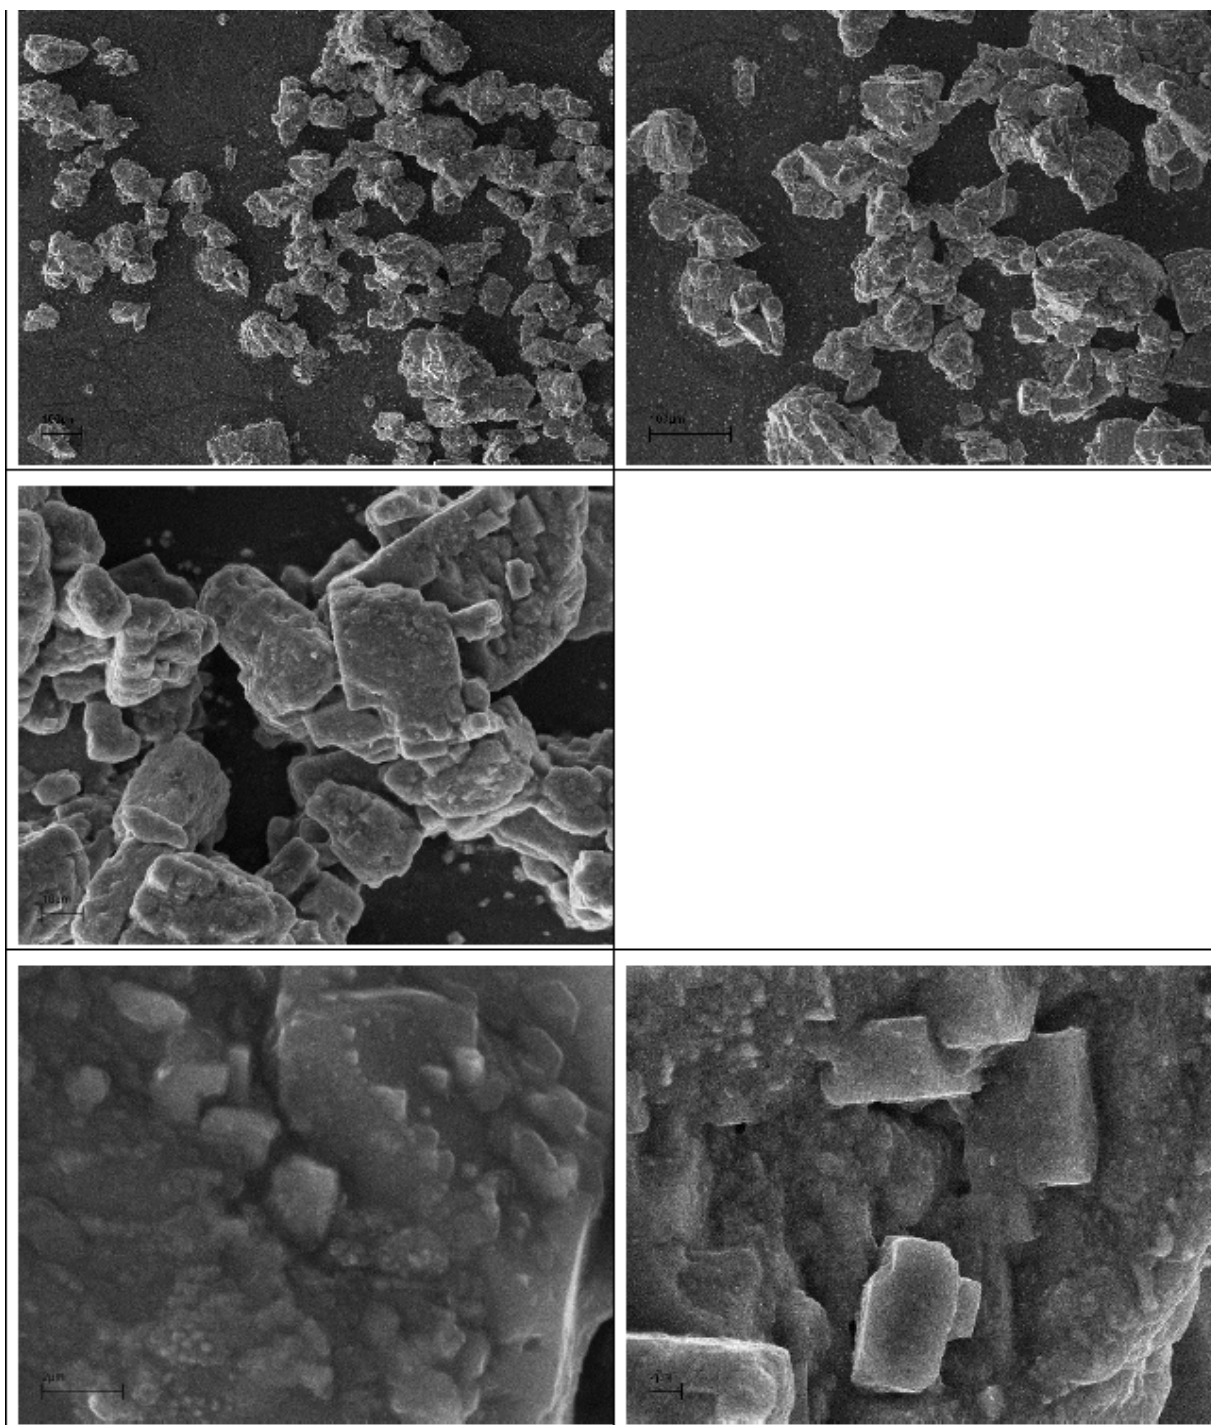

**Figure S1.** A. SEM images of sample S1.

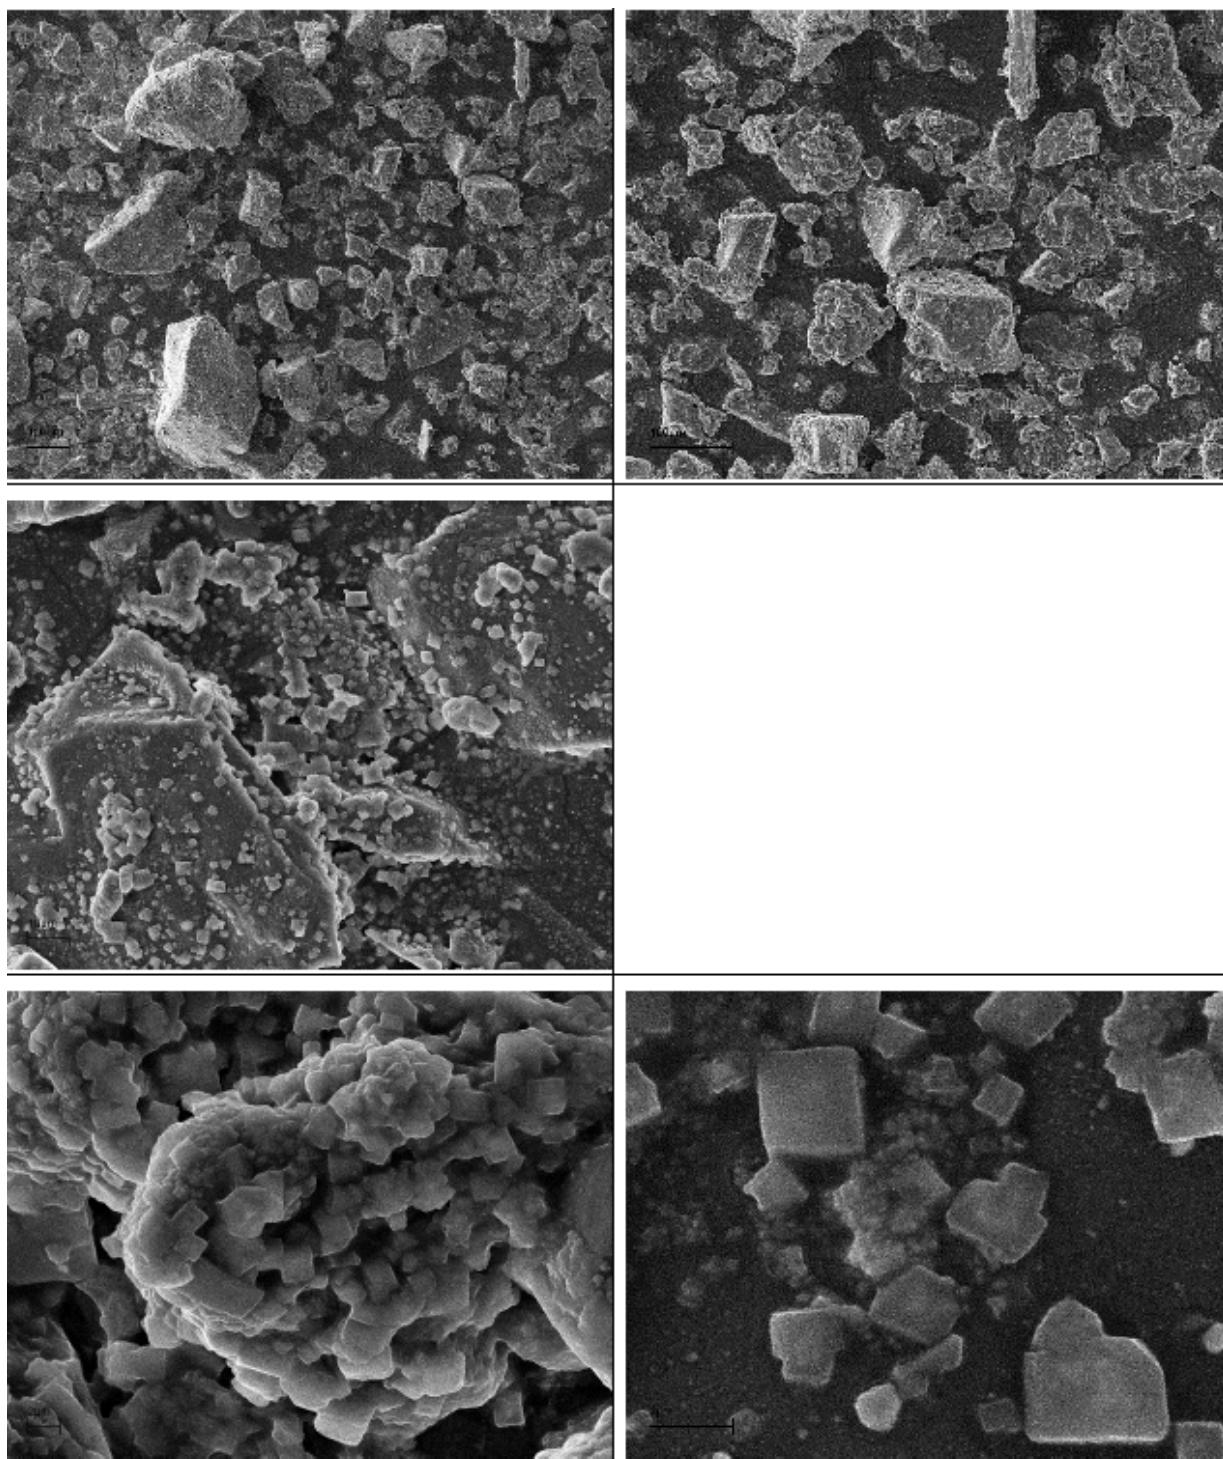

**Figure S1. B.** SEM images of sample S2.

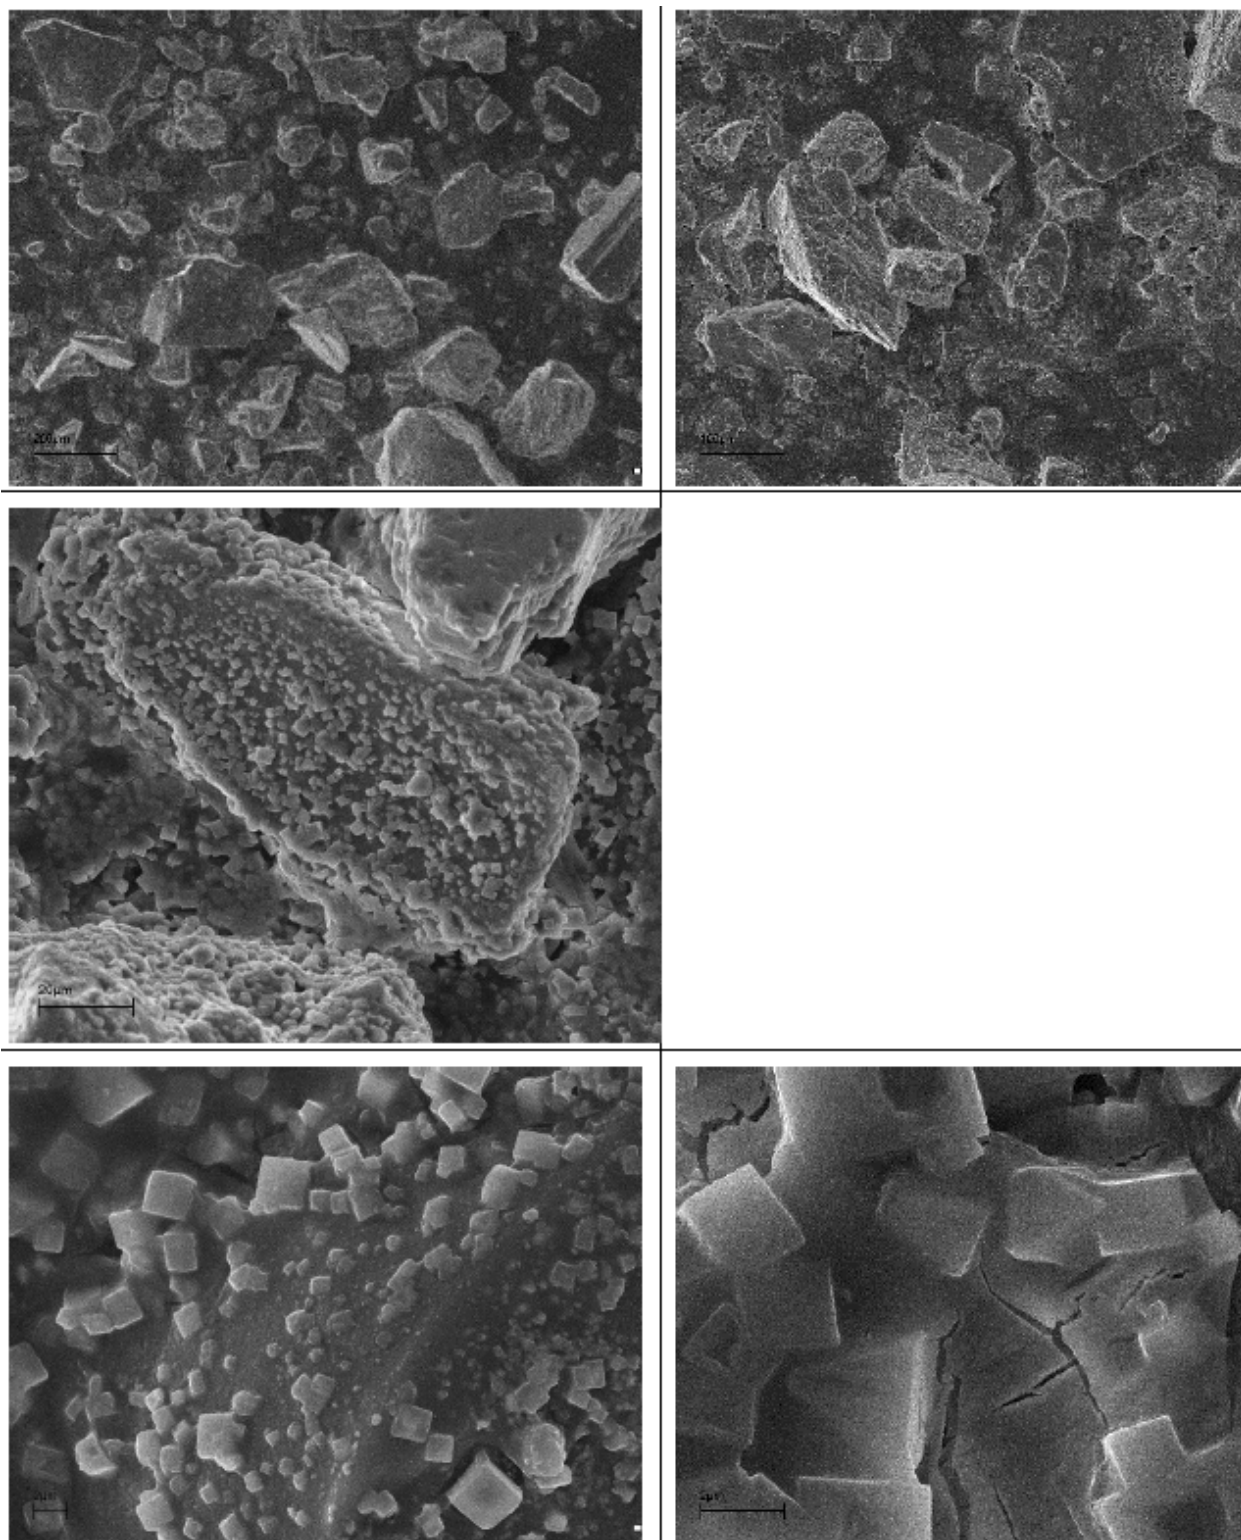

**Figure S1.** C. SEM images of sample S3.

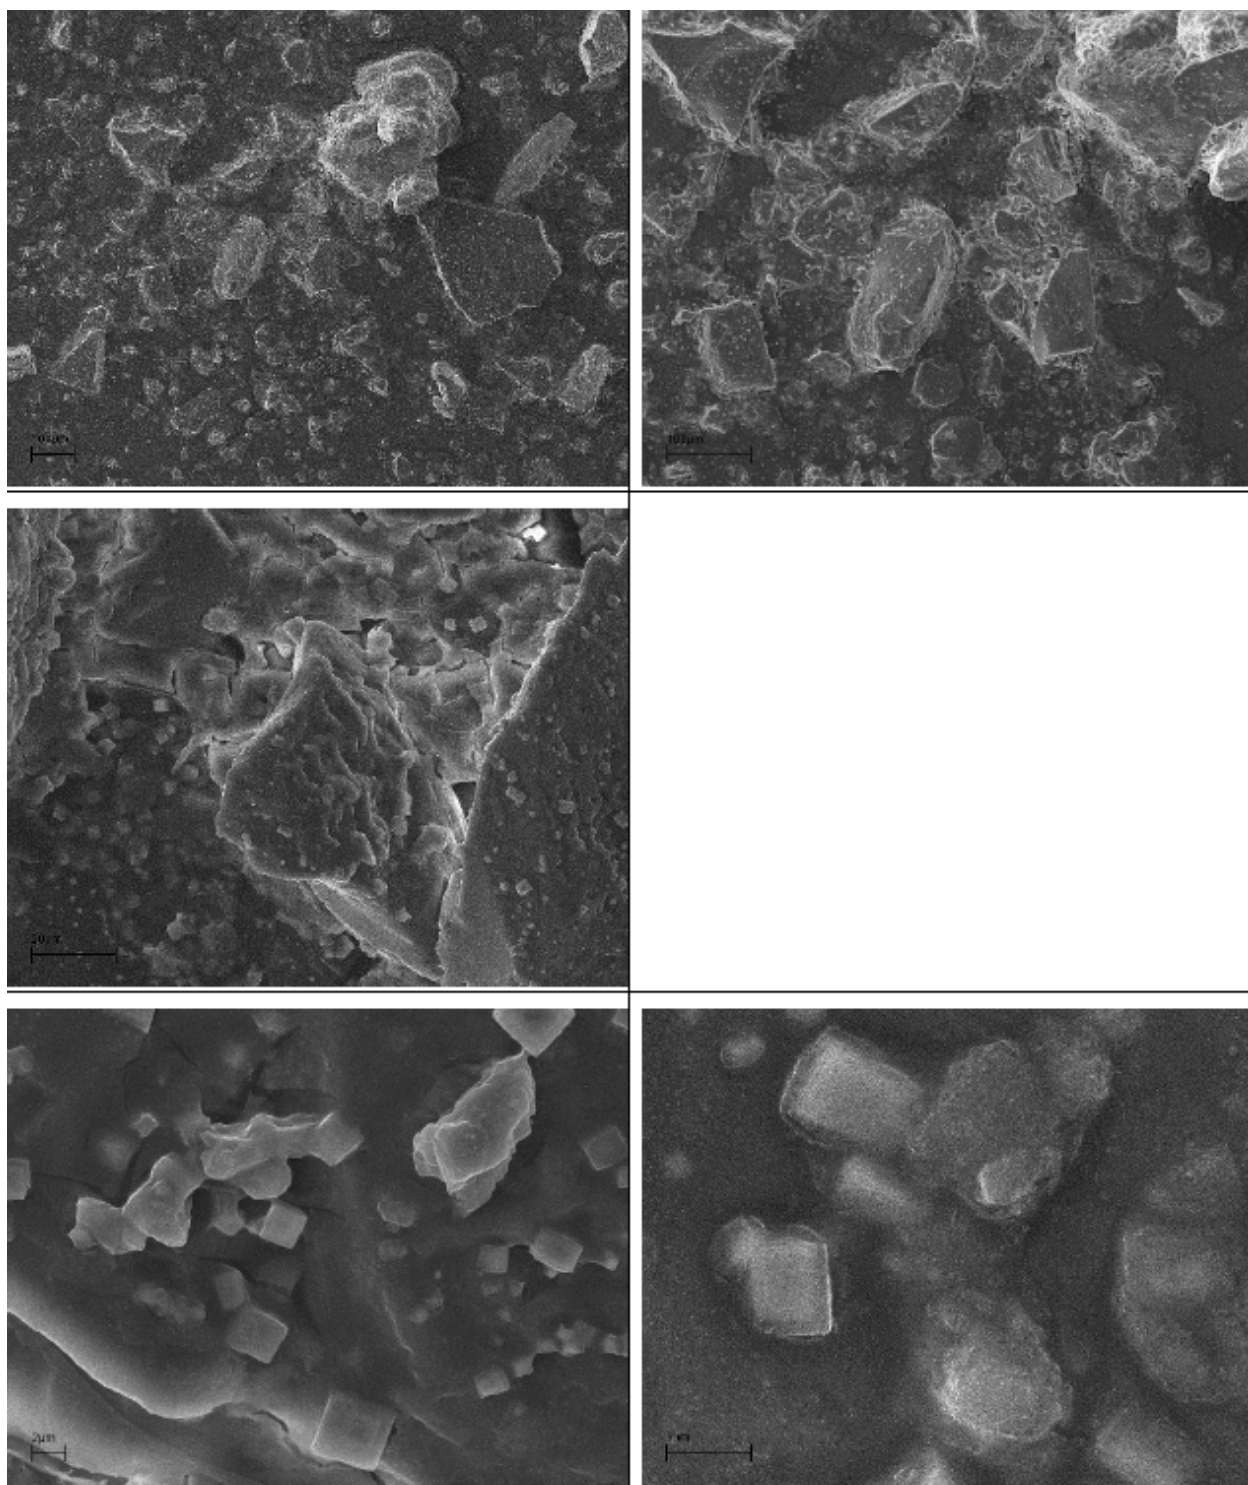

**Figure S1. D.** SEM images of sample S1.



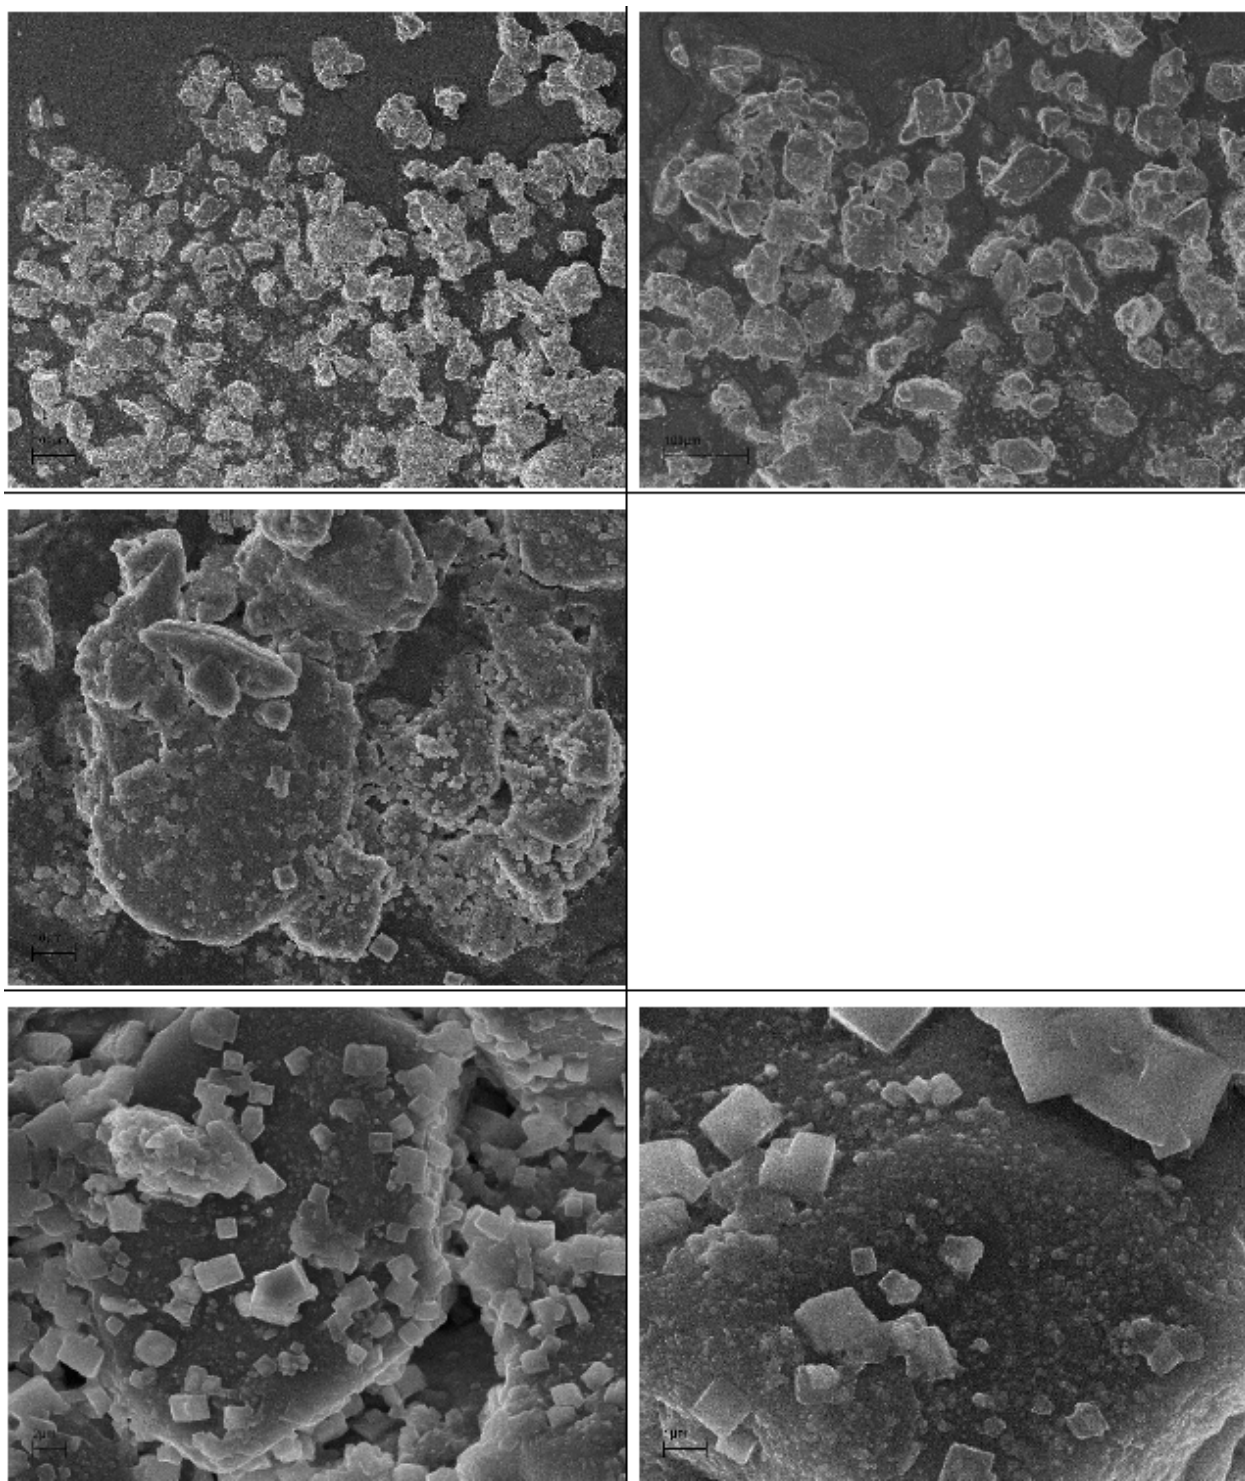

**Figure S1. E.** SEM eimages of sample S1.

**Figure S1.** SEM images



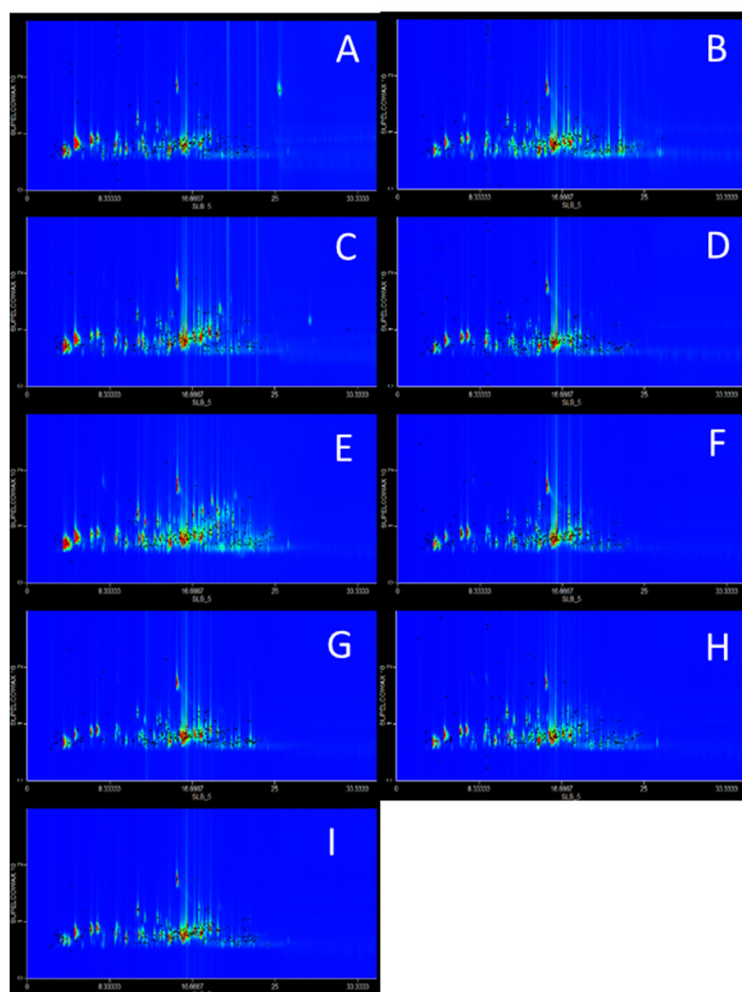

**Figure S2.** TIC chromatograms of volatile compounds isolated from plants discussed in the manuscript.

## Scrub 1

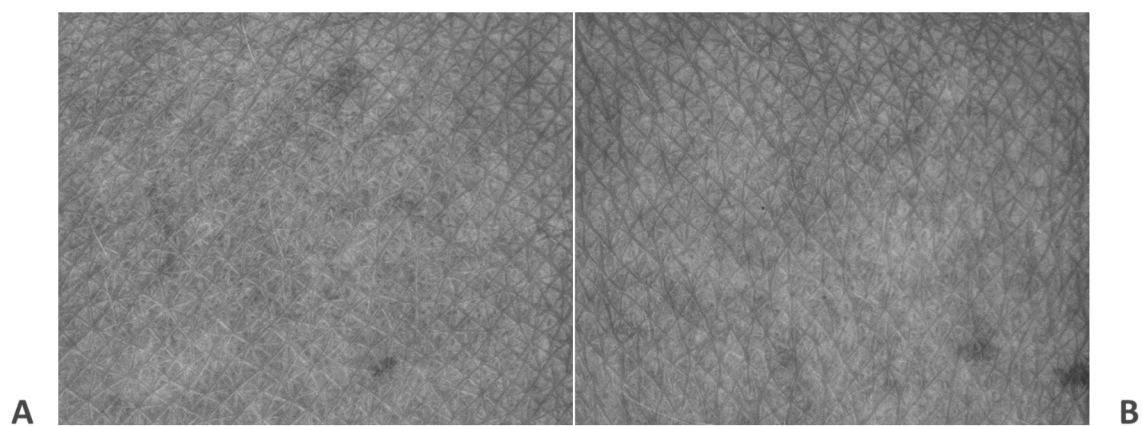

| S <sub>Er</sub> | S <sub>Esm</sub> | S <sub>Esc</sub> | S <sub>Ew</sub> | S <sub>Er</sub> | S <sub>Esm</sub> | S <sub>Esc</sub> | S <sub>Ew</sub> |
|-----------------|------------------|------------------|-----------------|-----------------|------------------|------------------|-----------------|
| 2.32            | 84.68            | 0.65             | 28.569          | 1.95            | 105.24           | 0.56             | 39.049          |

## Scrub 2

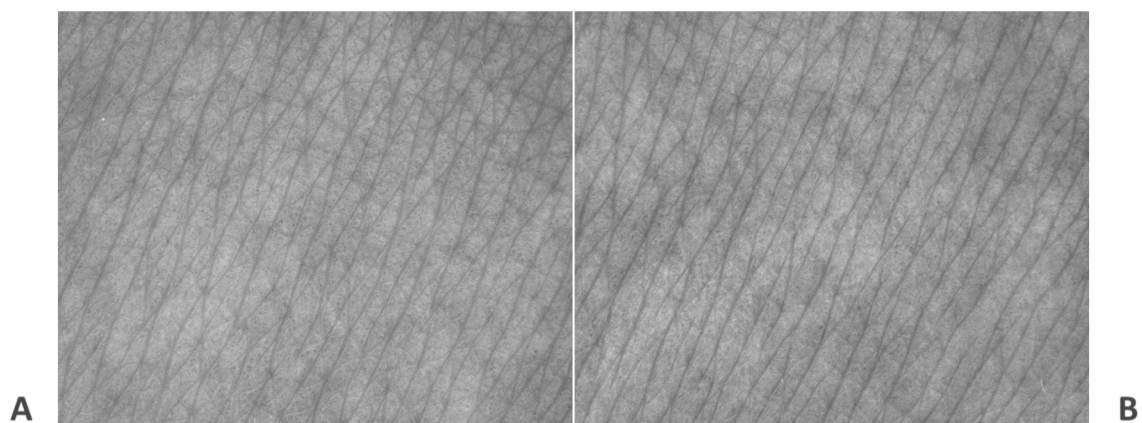

| S <sub>Er</sub> | S <sub>Esm</sub> | S <sub>Esc</sub> | S <sub>Ew</sub> | S <sub>Er</sub> | S <sub>Esm</sub> | S <sub>Esc</sub> | S <sub>Ew</sub> |
|-----------------|------------------|------------------|-----------------|-----------------|------------------|------------------|-----------------|
| 2.11            | 98.29            | 0.51             | 37.803          | 2.19            | 112.85           | 0.62             | 43.810          |

## Mask 5

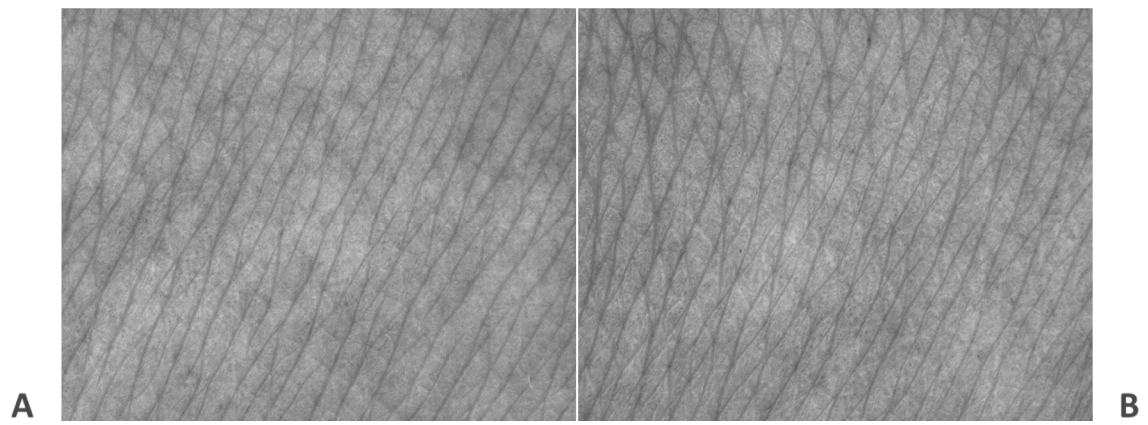

| S <sub>Er</sub> | S <sub>Esm</sub> | S <sub>Esc</sub> | S <sub>Ew</sub> | S <sub>Er</sub> | S <sub>Esm</sub> | S <sub>Esc</sub> | S <sub>Ew</sub> |
|-----------------|------------------|------------------|-----------------|-----------------|------------------|------------------|-----------------|
| 2.19            | 112.85           | 0.62             | 43.810          | 2.72            | 114.80           | 0.50             | 24.944          |

## Mask 6

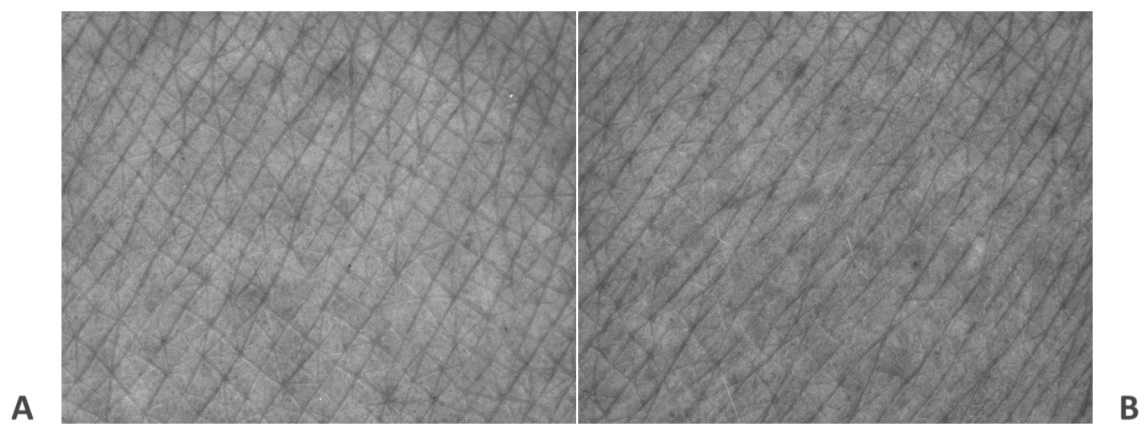

| S <sub>Er</sub> | S <sub>Esm</sub> | S <sub>Esc</sub> | S <sub>Ew</sub> | S <sub>Er</sub> | S <sub>Esm</sub> | S <sub>Esc</sub> | S <sub>Ew</sub> |
|-----------------|------------------|------------------|-----------------|-----------------|------------------|------------------|-----------------|
| 3.32            | 111.35           | 0.46             | 44.089          | 2.39            | 104.97           | 0.59             | 42.139          |

## Scrub 7

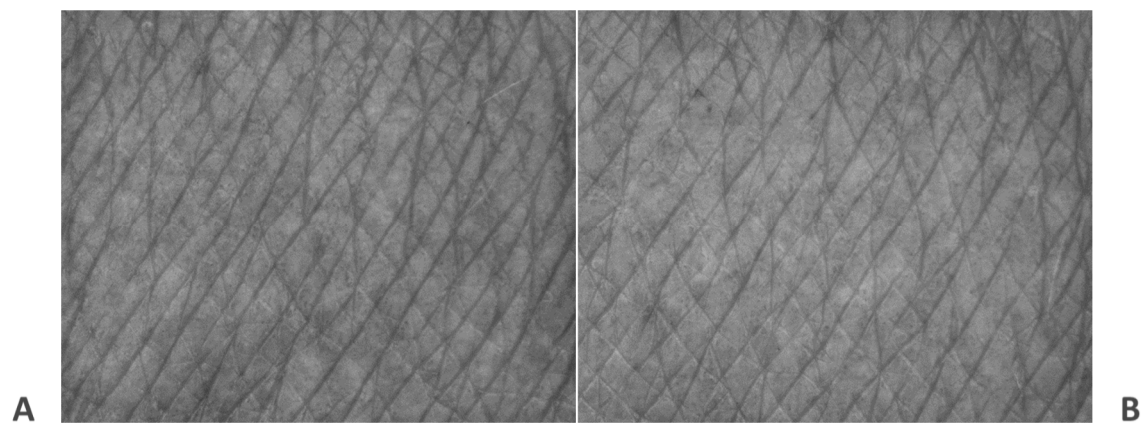

| S <sub>Er</sub> | S <sub>Esm</sub> | S <sub>Esc</sub> | S <sub>Ew</sub> | S <sub>Er</sub> | S <sub>Esm</sub> | S <sub>Esc</sub> | S <sub>Ew</sub> |
|-----------------|------------------|------------------|-----------------|-----------------|------------------|------------------|-----------------|
| 2.14            | 137.10           | 0.38             | 64.426          | 2.99            | 131.73           | 0.54             | 62.549          |

**Figure S3.** Skin topography images obtained before (A) and after application (B) of tested cosmetic products 1, 2, 5-7 with the corresponding parameters of skin topography
